# Supplementary material
Source: publisher site journal article supplement (https://www.spandidos-publications.com/4949/downloadSupplementary)
Supplement: Supplementary file 1 [file downloadSupplementary]

## Sheet: table s1
Table S1. Utilized ferroptosis-associated genes
id	logFC	AveExpr	t	P.Value	adj.P.Val	B
STAT3	-1.5101	11.3079	-10.9511	3.89634e-10	6.36771e-08	13.3536
TNFAIP3	1.84064	11.8158	10.6176	6.77962e-10	6.36771e-08	12.7942
JUN	3.25977	8.19258	10.4464	9.05361e-10	6.36771e-08	12.5018
ATG5	1.38576	8.4797	10.2548	1.25624e-09	6.62665e-08	12.1706
SNX4	2.1261	7.78242	9.4331	5.37257e-09	2.26723e-07	10.6992
HSPA5	1.40301	11.3783	9.24692	7.55286e-09	2.65609e-07	10.354
SETD1B	-1.2854	9.87868	-8.8103	1.7078e-08	5.14781e-07	9.52664
ATG3	1.39763	9.98065	8.69142	2.14163e-08	5.64854e-07	9.29701
LPCAT3	2.14702	6.81961	8.53796	2.87613e-08	6.74294e-07	8.99784
CEBPG	2.515	8.44739	8.1666	5.94672e-08	1.25476e-06	8.26073
PRDX6	-1.74088	11.6644	-7.99601	8.35305e-08	1.60227e-06	7.9159
MTOR	-1.27592	7.33032	-7.51462	2.22527e-07	3.90049e-06	6.92158
ATG16L1	-1.30728	8.02422	-7.47748	2.40315e-07	3.90049e-06	6.84356
CYBB	1.25329	10.7225	7.4072	2.78089e-07	4.19119e-06	6.69544
HMGB1	1.33596	12.5511	7.25326	3.83778e-07	5.06108e-06	6.36866
BRD4	-1.36321	10.0096	-6.87709	8.54526e-07	9.9914e-06	5.55695
MAPK14	-1.14769	9.53748	-6.85318	8.997e-07	9.9914e-06	5.50473
DRD5	-1.22335	8.2721	-6.80694	9.94145e-07	1.04882e-05	5.40356
CHMP5	1.81732	8.49483	6.67582	1.32148e-06	1.32671e-05	5.11514
ZNF419	-1.16192	8.26592	-6.65485	1.3833e-06	1.32671e-05	5.06883
GCH1	1.21289	11.1623	6.3128	2.93964e-06	2.2618e-05	4.30558
SLC38A1	-1.40962	10.709	-6.30345	3.00144e-06	2.2618e-05	4.28452
ATF3	2.31011	8.61243	6.25352	3.35492e-06	2.44099e-05	4.17188
MAPK9	1.09664	8.20998	6.16179	4.11953e-06	2.8974e-05	3.96422
CDKN1A	1.21917	10.1646	6.02351	5.62474e-06	3.71033e-05	3.64938
HMOX1	1.81062	10.2761	5.82915	8.7466e-06	5.42804e-05	3.20344
TFRC	1.31897	10.0028	5.43796	2.15365e-05	0.000122817	2.2949
ALOXE3	-1.75782	6.91386	-5.33285	2.75081e-05	0.000152742	2.04858
MT3	-2.17788	7.10705	-5.29232	3.02379e-05	0.000163595	1.95341
TFR2	-1.21962	7.32295	-5.16008	4.12174e-05	0.000212119	1.64206
SLC3A2	1.86519	9.12333	5.0826	4.94536e-05	0.000242668	1.45914
PLIN2	1.20278	10.2597	5.06671	5.13389e-05	0.000244329	1.42159
VEGFA	1.20538	7.95378	5.04906	5.35189e-05	0.000245489	1.37985
NRAS	1.65899	8.05409	4.96278	6.56031e-05	0.00028838	1.17566
GABARAPL2	-1.20055	12.1232	-4.92803	7.12203e-05	0.000306683	1.09332
DDIT4	1.06327	10.6598	4.9173	7.30496e-05	0.000308269	1.0679
CXCL2	3.22497	7.8457	4.81006	9.41813e-05	0.000382159	0.813466
RB1	1.33265	7.37959	4.67972	0.000128368	0.000492467	0.503798
AKR1C3	2.44319	7.92561	4.58046	0.000162598	0.000601899	0.267781
LONP1	1.02541	8.61681	4.55501	0.000172767	0.000628515	0.207265
CBS	-1.57997	5.76782	-4.52789	0.000184311	0.000659147	0.142762
HSPB1	1.61809	8.74832	4.50014	0.000196927	0.000692526	0.0767662
EPAS1	-1.01313	7.23342	-4.13619	0.000469892	0.00154918	-0.787403
PSAT1	-1.78765	6.92736	-4.12734	0.000479941	0.00155796	-0.808358
ACSL4	1.07449	7.01857	3.95528	0.000723936	0.00224633	-1.2147
FLT3	1.75618	7.34815	3.8229	0.000992649	0.00294998	-1.52573
SLC2A1	-1.07913	8.26476	-3.76997	0.00112592	0.00329959	-1.64959
SLC2A6	1.67234	8.28181	3.74348	0.00119913	0.00346597	-1.71146
FADS2	1.51265	6.96628	3.37659	0.0028529	0.00761978	-2.55802
